# Supplementary material for: Tunable, conductive, self-healing, adhesive and injectable hydrogels for bioelectronics and tissue regeneration applications
Source: Royal Society of Chemistry journal article supplement (doi:10.1039/d1tb01075a), 2021-01-01
Supplement: d1tb01075a1.pdf [file d1tb01075a1.pdf]

## Supporting Information

### **Tunable, conductive, self-healing, adhesive and injectable hydrogel for bioelectronics and tissue regeneration applications**

*Vineeta Panwar<sup>1</sup>, Anand Babu<sup>2</sup>, Anjana Sharma<sup>1</sup>, Jijo Thomas<sup>1</sup>, Vianni Chopra<sup>1</sup>, Pinki Malik<sup>2</sup>, Swati Rajput<sup>3</sup>, Monika Mittal<sup>3</sup>, Rajdeep Guha<sup>4</sup>, Naibedya Chattopadhyay<sup>3</sup>, Dipankar Mandal<sup>2</sup> and Deepa Ghosh<sup>1\*</sup>*

<sup>1</sup>Chemical Biology Unit, Institute of Nano Science and Technology, Sector-81, Mohali-140306, Punjab, India.

<sup>2</sup>Quantum Materials and Devices Unit, Institute of Nano Science and Technology, Sector-81, Mohali-140306, Punjab, India.

<sup>3</sup>Division of Endocrinology and Centre for Research in ASTHI, CSIR-Central Drug Research Institute, Council of Scientific and Industrial Research, Lucknow 226031, U.P., India.

<sup>4</sup>Laboratory Animal Facility, CSIR-Central Drug Research Institute, Council of Scientific and Industrial Research, Lucknow 226031, U.P., India.

\*Correspondence: Dr. Deepa Ghosh (deepa.ghosh@inst.ac.in, Tel.: 0172-221075)

## Table of Contents

|                                                                                       |   |
|---------------------------------------------------------------------------------------|---|
| Figure S1. Scheme for the synthesis of carboxymethyl chitosan.....                    | 3 |
| Figure S2. FTIR Spectra of chitosan and carboxymethyl chitosan.....                   | 3 |
| Figure S3. FTIR Spectra of CMC, CMC-D and CMC-D-PDA.....                              | 4 |
| Figure S4. FTIR Spectra of CMC-D-PDA, CMCh and Ch-CMC-PDA.....                        | 4 |
| Figure S5. Scheme for the synthesis of Ch-CMC-PDA.....                                | 5 |
| Figure S6. The recovery of hydrogel after high shear load.....                        | 6 |
| Figure S7. I-V curves of hydrogels swollen in PBS and deionized H <sub>2</sub> O..... | 6 |
| Figure S8. Schematic representation for conductivity.....                             | 7 |
| Figure S9. Scheme of device fabrication for TENG.....                                 | 7 |
| Figure S10. Cytocompatibility studies.....                                            | 8 |
| Figure S11. MTT Assay.....                                                            | 8 |
| Table S1. Conductivity Comparison with the reported hydrogels.....                    | 9 |
| References.....                                                                       | 9 |

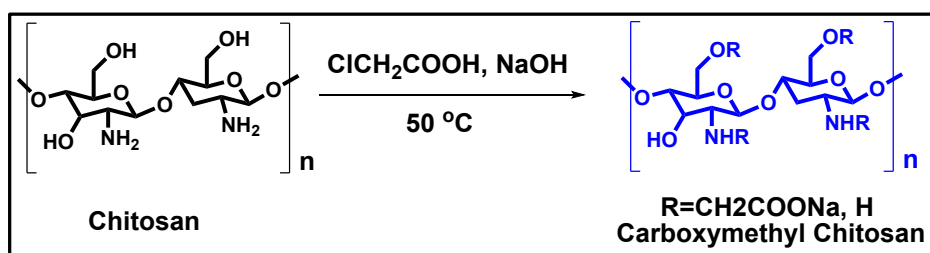

**Figure S1.** Scheme for the synthesis of carboxymethyl chitosan.

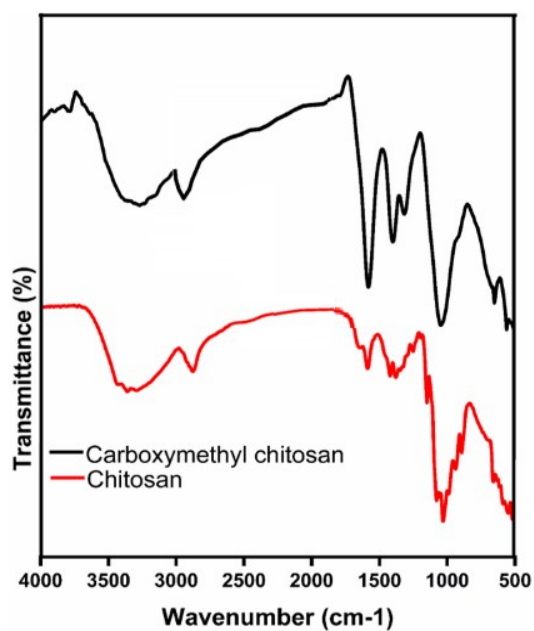

**Figure S2.** FTIR Spectra of chitosan and carboxymethyl chitosan

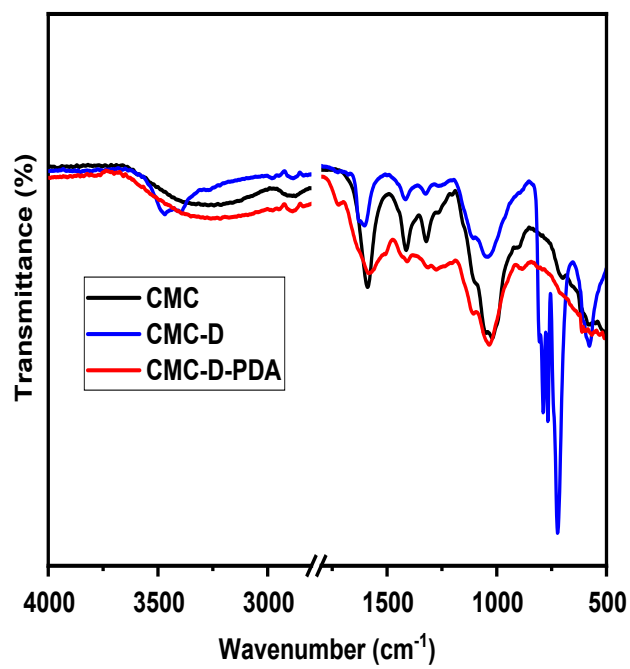

**Figure S3.** FTIR Spectra of CMC, CMC-D and CMC-D-PDA

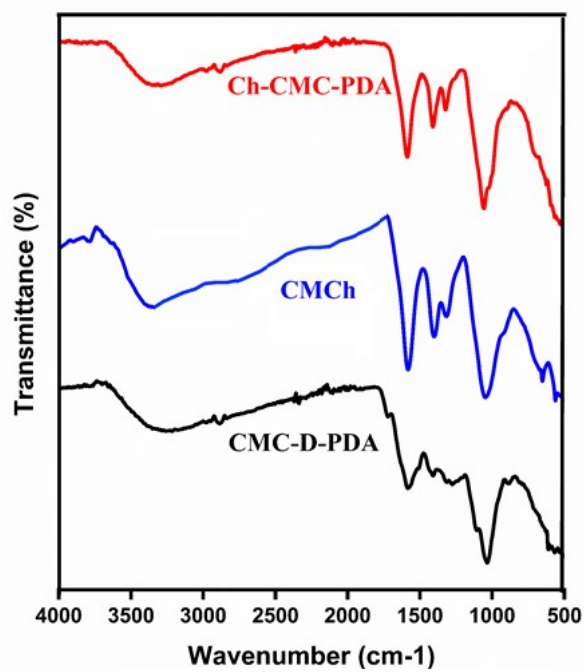

**Figure S4.** FTIR Spectra of CMC-D-PDA, CMCh and Ch-CMC-PDA

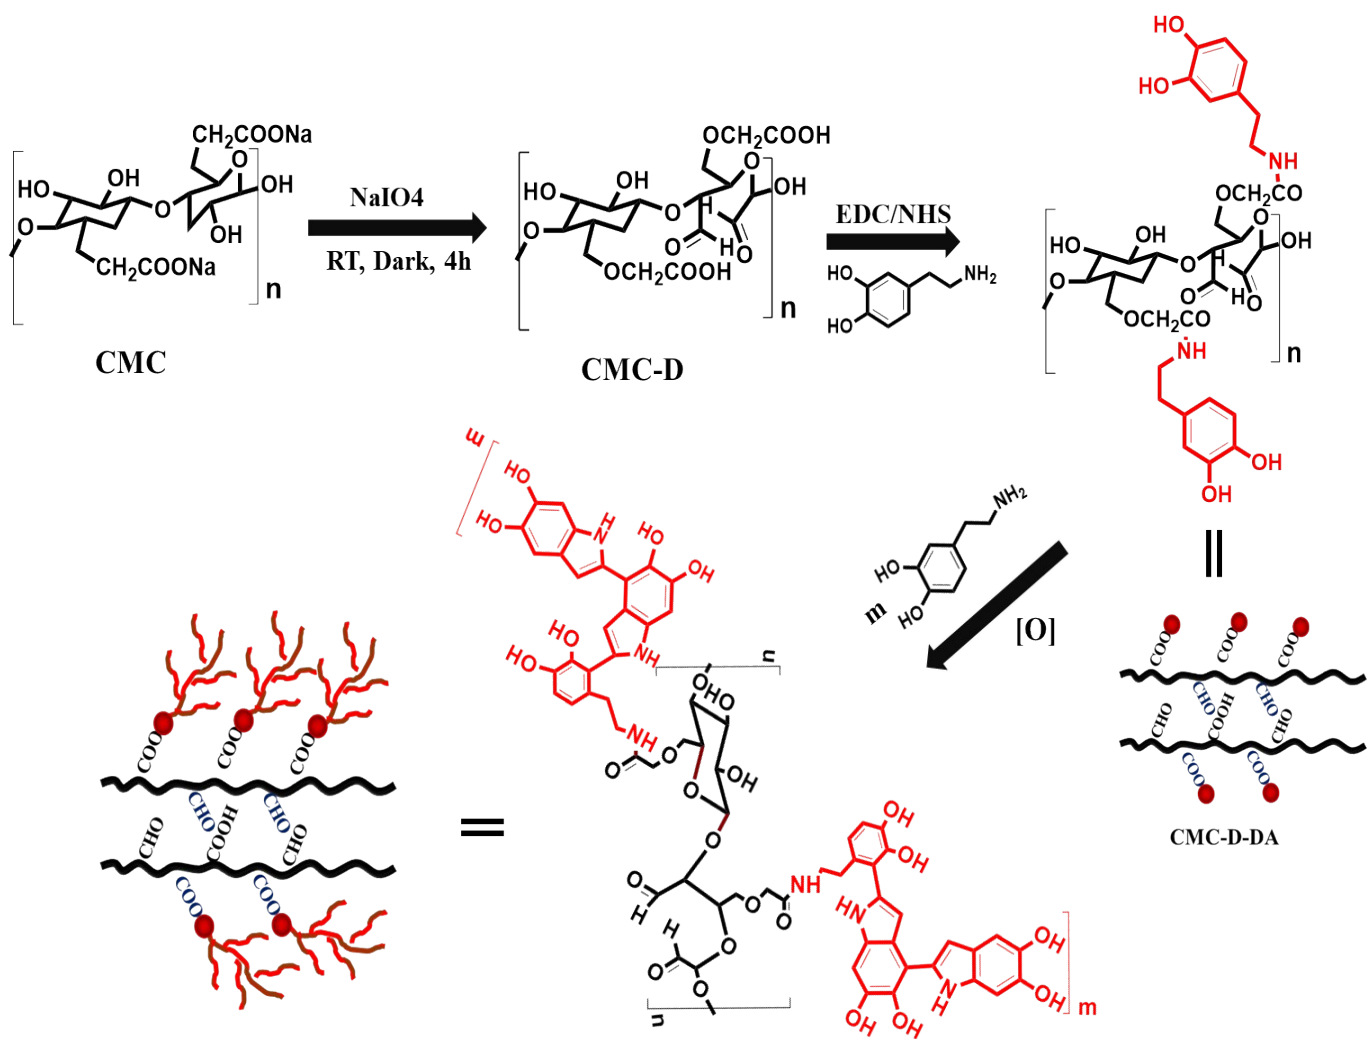

Figure S5. Scheme for the synthesis of Ch-CMC-PDA

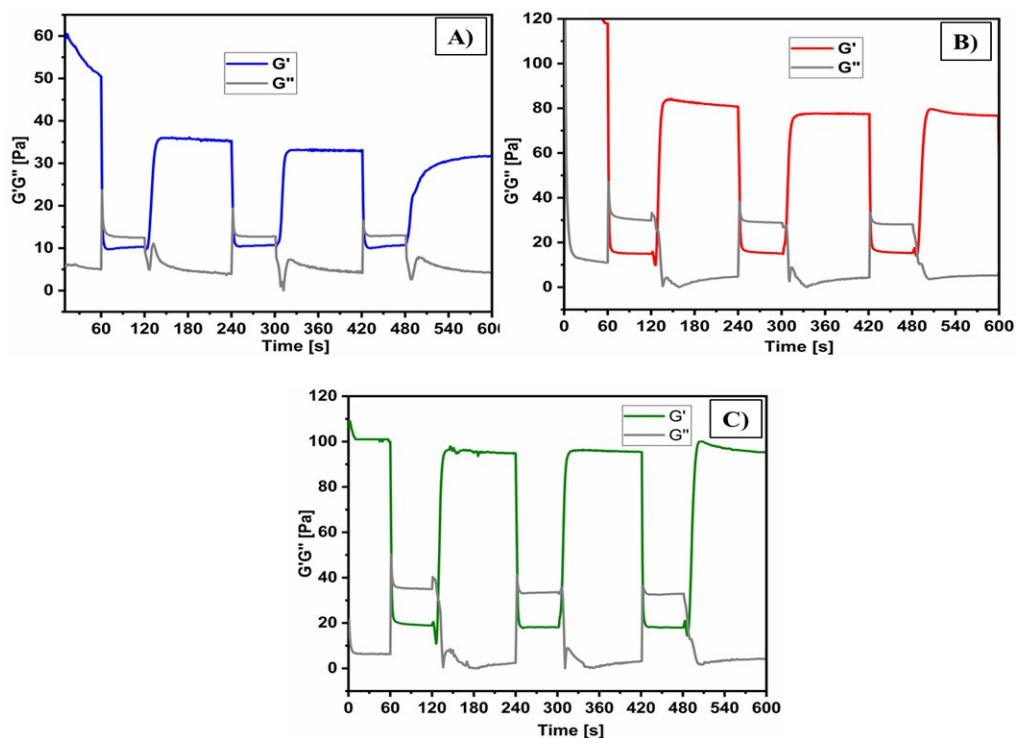

**Figure S6.** The recovery of hydrogel after high shear load demonstrated by the continuous step strain. A) Ch-CMC-PDA<sub>1</sub>, B) Ch-CMC-PDA<sub>2</sub>, C) Ch-CMC-PDA<sub>3</sub>

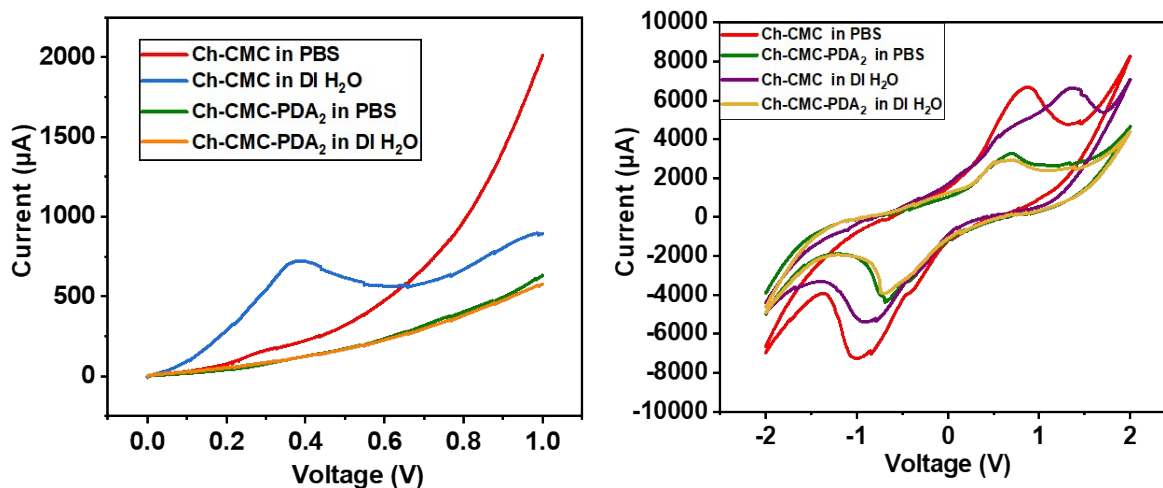

**Figure S7.** Current-Voltage characteristics of Ch-CMC and Ch-CMC-PDA<sub>2</sub> hydrogel swollen in PBS and deionized H<sub>2</sub>O

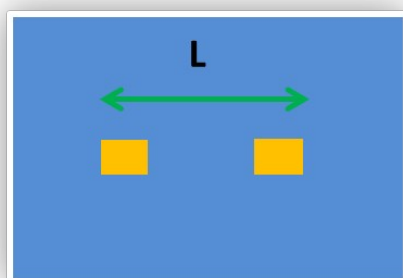

**Figure S8.** Schematic representation for electrical measurement

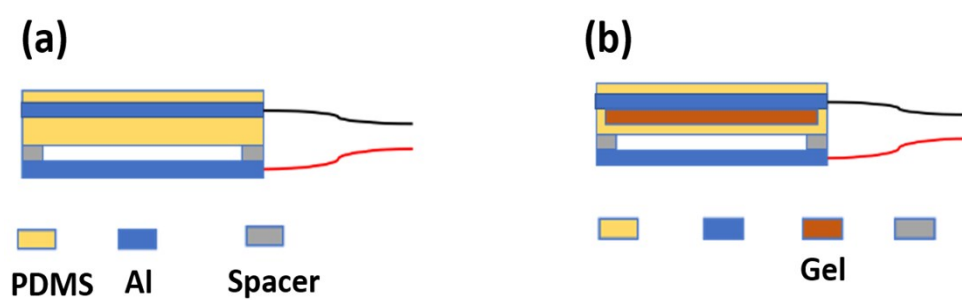

**Figure S9.** Scheme of device fabrication for TENG (a) Control and (b) Ch-CMC-PDA<sub>x</sub>

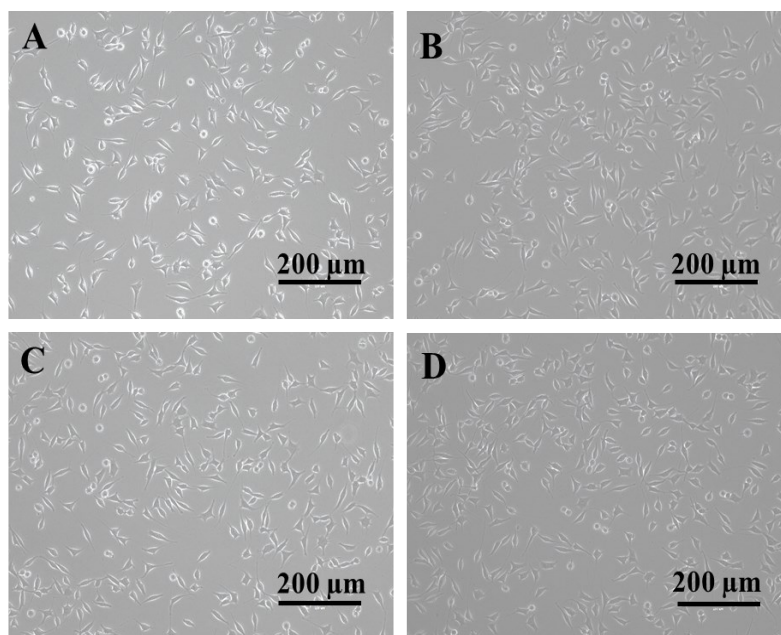

**Figure S10.** Cytocompatibility studies. Bright field images of L929 cells treated with contact media and incubated for 72 h. (A) Untreated control, (B) Ch-CMC-PDA<sub>1</sub>, (C) Ch-CMC-PDA<sub>2</sub> (D) Ch-CMC-PDA<sub>3</sub> respectively.

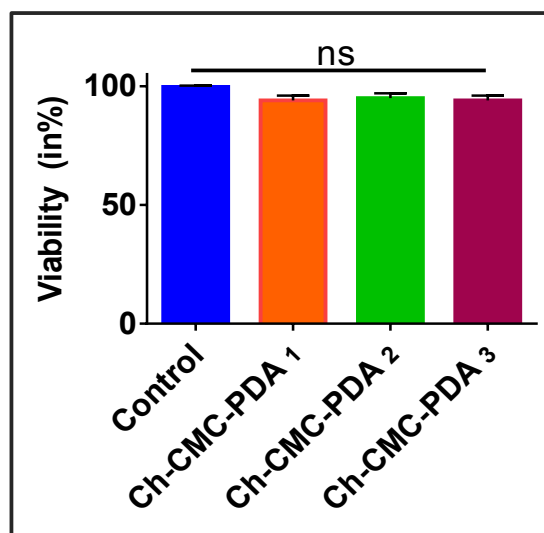

**Figure S11.** Cell viability on exposure of L929 cells with hydrogel-contact media using MTT assay. Data represents mean  $\pm$  SD from 3 experiments carried out in triplicate. ns indicates no significant change (One-way ANOVA, Tukey's multiple comparison test).



**Table S1.** Conductivity comparison with the reported hydrogels

| S. No. | Material                                         | Application                                           | Conductivity                       | Ref.            |
|--------|--------------------------------------------------|-------------------------------------------------------|------------------------------------|-----------------|
| 1.     | PEDOT:<br>PSS/peptide-PEG<br>hydrogels           | Tissue engineering                                    | $8-16 \times 10^{-3}$<br>S/cm      | [1]             |
| 2.     | GOxSPNB<br>Hydrogels.                            | Adhesive                                              | $1.05 \times 10^{-2}$ S/cm         | [2]             |
| 3.     | PNIPAM/L/CNT                                     | Human monitoring<br>motion                            | $1.3-1.9 \times 10^{-3}$<br>S/cm   | [3]             |
| 4.     | PDA-pGO-PAM<br>hydrogel                          | Cell stimulators and<br>implantable<br>bioelectronics | $2-10 \times 10^{-2}$<br>S/cm      | [4]             |
| 5.     | Chitosan/graphene<br>oxide composite<br>hydrogel | Tissue engineering                                    | $0.57-1.22 \times 10^{-3}$<br>S/cm | [5]             |
| 6.     | Poly (NIPAM-co- $\beta$ -CD) hydrogel            | Sensors, human<br>motion sensing                      | $3.5 \times 10^{-2}$ S/cm          | [6]             |
| 7.     | CS-AT Hydrogel                                   | Cell Delivery Carrier<br>for Cardiac Cell<br>Therapy  | $2.2-2.4 \times 10^{-3}$<br>S/cm   | [7]             |
| 8.     | QCSP/PEGS-FA<br>hydrogel                         | Wound dressing and<br>cutaneous wound<br>healing      | $2.25-3.5 \times 10^{-3}$<br>S/cm  | [8]             |
| 9.     | Ch-CMC-PDAx<br>hydrogel                          | Multi-functional<br>hydrogel                          | $0.01-3.4 \times 10^{-3}$<br>S/cm  | Our<br>Hydrogel |

## References

- [1] Z. Deng, H. Wang, P.X. Ma and B. Guo, *Nanoscale*, 2020, **12**, 1224-1246.
- [2] Z. Deng, T. Hu, Q. Lei, J. He, P.X. Ma and B. Guo, *ACS applied materials & interfaces*, 2019, **11**, 6796-6808.
- [3] Y. Wang, F. Huang, X. Chen, X.-W. Wang, W.-B. Zhang, J. Peng, J. Li and M. Zhai, *Chemistry of Materials*, 2018, **30**, 4289-4297.
- [4] L. Han, X. Lu, M. Wang, D. Gan, W. Deng, K. Wang, L. Fang, K. Liu, C.W. Chan and Y. Tang, *Small*, 2017, **13**, 1601916.
- [5] X. Jing, H.-Y. Mi, B.N. Napiwocki, X.-F. Peng and L.-S. Turng, *Carbon*, 2017, **125**, 557-570.
- [6] Z. Deng, Y. Guo, X. Zhao, P.X. Ma and B. Guo, *Chemistry of Materials*, 2018, **30**, 1729-1742.
- [7] R. Dong, X. Zhao, B. Guo and P.X. Ma, *ACS applied materials & interfaces*, 2016, **8**, 17138-17150.
- [8] X. Zhao, H. Wu, B. Guo, R. Dong, Y. Qiu and P.X. Ma, *Biomaterials*, 2017, **122**, 34-47.
